# The American Journal of PSYCHIATRY

Latest  
IMPACT  
FACTOR  
12.759!

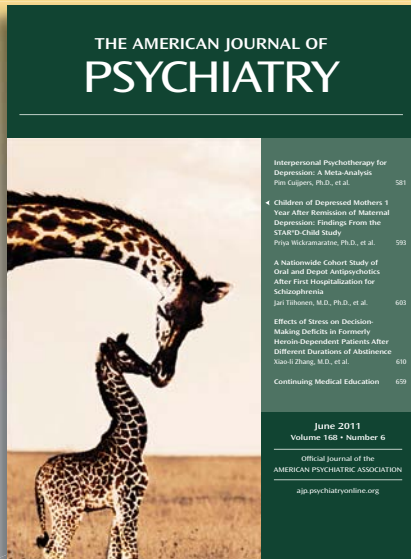

## Official Journal of the American Psychiatric Association

Edited by Robert Freedman, M.D.

- The *American Journal of Psychiatry* has an impact factor of 12.759, a rise from last year's 12.522 and 2-point rise from the previous year's 10.545, according to the recently released 2010 Journal Citation Reports® (Thomson Reuters, 2011), placing it 2nd among the 126 journals in psychiatry journals indexed, while still remaining the far-and-away leader in total citations.

- *The American Journal of Psychiatry* (AJP) is also the #2 journal in psychiatry in terms of immediacy according to Thomson Scientific's Immediacy Index. This important performance metric

is calculated by dividing the number of citations to articles published in a given year by the number of articles published in that year.

- The Immediacy Index is a good measure of how quickly a given journal's articles are cited—AJP's #2 placement is a result of publishing articles that are relevant, covering current “hot” topics and cutting-edge research, and getting these findings to the field faster with AJP in Advance, the Journal's online-ahead-of-print publication protocol.

- A recent poll conducted by the BioMedical & Life Sciences Division of The Special Libraries Association identified the 100 most influential journals in all of Biology & Medicine over the last 100 years. *The American Journal of Psychiatry* was among those honored, the only psychiatry/psychology journal represented.

No other psychiatric journal reaches more psychiatrists with greater impact or immediacy than the journal that the overwhelming majority of psychiatrists considers essential: AJP.

ISSN 0002-953X      [ajp.psychiatryonline.org](http://ajp.psychiatryonline.org)

To order a subscription, visit [www.appi.org](http://www.appi.org).

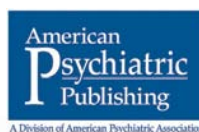

The First and Last Word in Psychiatry

[www.appi.org](http://www.appi.org) • 1-800-368-5777 • 703-907-7322

Find us on [facebook](https://www.facebook.com/ajp) and [twitter](https://twitter.com/ajp)      Priority Code AH1132

# The Residents' JOURNAL

*The Residents' JOURNAL*  
a publication of  
The American Journal of Psychiatry

July 2011      Volume 6      Issue 7

**Inside**

- 1 In This Issue
- 2 **Transitions**  
Sarah M. Fayad, M.D.
- 3 **Somatoform Disorders in Children and Adolescents: A Review**  
Katrine Enrile, M.D.
- 5 **Evaluating Sleep Disturbances in Abused Children and Adolescents**  
Brooks R. Keshin, M.D.
- 7 **Clozapine-Induced Myocarditis: A Case Report**  
Dharmendra Kumar, M.D.
- 9 **The Potential Benefit of Combining Mindfulness and Physical Exercise**  
Brandon J. Cornejo, M.D., Ph.D.
- 11 **Book Review**  
Melissa J. Lesco, M.D.
- 12 **Book Review**  
Hetal Bhingradia, M.D.  
Janki S. Modi, M.D.
- 13 **Test Your Knowledge**
- 14 **Residents' Journal Info**

*In This Issue*



This issue of *The Residents' Journal* covers a variety of topics. Two articles on child and adolescent psychiatry are presented, with one providing data on the diagnosis and treatment of somatoform disorders in children and adolescents (by Katrine Enrile, M.D.) and another offering information on the evaluation of sleep disturbances in abused individuals in this population (by Brooks R. Keshin, M.D.). Clozapine-induced myocarditis is discussed in a case report (by Dharmendra Kumar, M.D.), and the benefits of combining mindfulness techniques with physical exercise as adjunctive therapy for psychiatric disorders are reviewed (by Brandon J. Cornejo, M.D., Ph.D.)

**Editor-in-Chief**  
Sarah M. Fayad, M.D.  
**Senior Editor**  
Joseph M. Cerimele, M.D.  
**Associate Editor**  
Manita Seawell, M.D.

**Editors Emeriti**  
Sarah B. Johnson, M.D.  
Molly McVoy, M.D.  
**Guest Section Editor**  
Karthik Sivashanker, M.D.  
**Staff Editor**  
Angela Moore

The Residents' Journal accepts manuscripts authored by medical students, resident physicians, and fellows. To submit your paper, please visit the manuscript submission site at [mc.manuscriptcentral.com/appi-ajp](http://mc.manuscriptcentral.com/appi-ajp) and either create an account or use your existing account. For manuscript type, select "Residents." Then follow the instructions to upload your manuscript. Residents who are interested in participating as Guest Section Editors should e-mail the Residents' Journal Editor-in-Chief Sarah M. Fayad at [fayad@ufl.edu](mailto:fayad@ufl.edu).

See the September 2010 issue for details on the new peer review process.

The Residents' Journal is sent free-of-charge to all psychiatry residents. Anyone interested in being included on the distribution list should contact Angela Moore, the Residents' Journal staff editor at [ajp@psych.org](mailto:ajp@psych.org) with "Subscribe to Residents' Journal" in the subject line.

**Upcoming Issue Themes**  
August: Clinical Trials  
September: Addiction

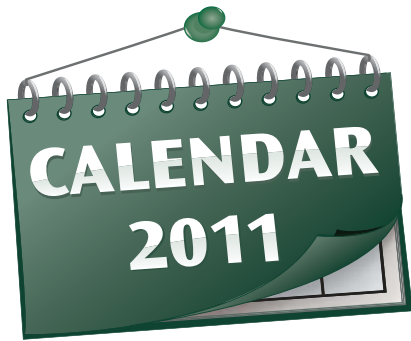

*For free listing of your organization's official annual or regional meeting, please send us the following information: sponsor, location, inclusive dates, type and number of continuing education credits (if available), and the name, address, and telephone number of the person or group to contact for more information. In order for an event to appear in our listing, all notices and changes must be received at least 6 months in advance of the meeting and should be addressed to:*

*Calendar, American Journal of Psychiatry, 1000 Wilson Boulevard, Suite 1825, Arlington, VA 22209-3901, [swstrate@psych.org](mailto:swstrate@psych.org) (e-mail).*

*Because of space limitations, only listings of meetings of the greatest interest to Journal readers will be included.*

---

## SEPTEMBER

**September 15**, Deadline for abstract submissions for May 2012 Annual Meeting of the American Psychiatric Association.

---

## OCTOBER

**October 5–8**, II International Congress, Dual Disorders, Addictive Behaviors and other Mental Disorders, Barcelona, Spain. Contact: SEPD, [www.cipd2011.com](http://www.cipd2011.com) (web site).

**October 18–23**, 58th Annual Meeting of the American Academy of Child and Adolescent Psychiatry, Toronto, Ontario. Contact: AACAP, 3615 Wisconsin Avenue, N.W., Washington, DC 20016-3007; (202) 966-7300 (tel), (202) 966-2891 (fax), [meetings@aacap.org](mailto:meetings@aacap.org) (e-mail), [www.aacap.org](http://www.aacap.org) (web site).

**October 27–30**, 63rd Institute on Psychiatric Services, American Psychiatric Association, San Francisco, CA. Contact: APA Annual Meetings Dept., 1000 Wilson Blvd., Ste. 1825, Arlington, VA 22209; (703) 907-7815.

---

## NOVEMBER

**November 1–December 5**, Poster submissions open for May 2012 Annual Meeting of the American Psychiatric Association.

---

## DECEMBER

**December 4–8**, 50th Annual Meeting, American College of Neuropsychopharmacology, Waikaloa Beach, Hawaii. Contact: [acnp@acnp.org](mailto:acnp@acnp.org); (615) 324-2360.

---

## MARCH 2012

**March 21–24**, 23rd Annual Meeting, American Neuropsychiatric Association, New Orleans, La. Contact: (614) 447-2077 or visit [www.anpaonline.org](http://www.anpaonline.org) (web site).

---

## MAY 2012

**May 5–9**, 165th Annual Meeting, American Psychiatric Association, Philadelphia, Pa. Contact: APA Annual Meetings Dept., 1000 Wilson Blvd., Ste. 1825, Arlington, VA 22209; (703) 907-7815.

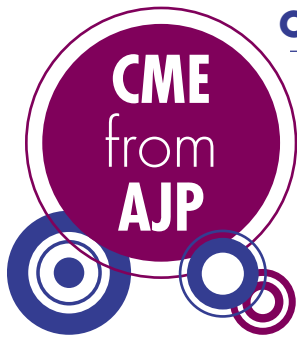

## Continuing Medical Education

Three articles in this issue form the basis of a short course with questions that can be answered for up to 1 *AMA PRA Category 1 Credit™* each by visiting <http://cme.psychiatryonline.org/> and clicking on “American Journal of Psychiatry CME.”

CME credit is issued only online, and a paid subscription to the AJP CME course program is required.

This month's courses appear on pages 869–872.

**FREE AUDIO!**

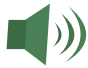

## Have You Heard?

You can listen to highlights of *The American Journal of Psychiatry* by downloading a monthly free .mp3 audio file from our web site (<http://ajp.psychiatryonline.org/misc/audio.dtl>) or by subscribing to the AJP Audio podcast at iTunes or other feed reader (e.g., NewzCrawler, FeedDemon, Bloglines, Google Reader). Presented by Deputy Editor Dr. Susan Schultz or by Editorial Director Michael Roy, each month's audio lasts approximately 30 minutes and covers several research articles, the Treatment in Psychiatry feature, and one or two editorials.

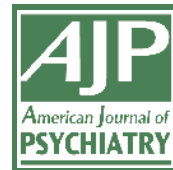

**Coming in the September 2011 issue\***

## THE AMERICAN JOURNAL OF PSYCHIATRY

### Prevalence of Autism Spectrum Disorders in a Total Population Sample

Y.S. Kim, B.L. Leventhal, Y.-J. Koh, E. Fombonne, E. Laska, E.-C. Lim, K.-A. Cheon, S.-J. Kim, Y.-K. Kim, H. Lee, D.-H. Song, and R.R. Grinker

### Depressive Symptoms, Health Behaviors, and Subsequent Inflammation in Patients With Coronary Heart Disease: Prospective Findings From the Heart and Soul Study

H.E. Duivis, P. de Jonge, B.W. Penninx, B.Y. Na, B.E. Cohen, and M.A. Whooley

### Analysis of 94 Candidate Genes and 12 Endophenotypes for Schizophrenia From the Consortium on the Genetics of Schizophrenia

T.A. Greenwood, L.C. Lazzeroni, S.S. Murray, K.S. Cadenhead, M.E. Calkins, D.J. Dobie, M.F. Green, R.E. Gur, R.C. Gur, G. Hardiman, J.R. Kelsoe, S. Leonard, G.A. Light, K.H. Nuechterlein, A. Olincy, A.D. Radant, N.J. Schork, L.J. Seidman, L.J. Siever, J.M. Silverman, W.S. Stone, N.R. Swerdlow, D.W. Tsuang, M.T. Tsuang, B.I. Turetsky, R. Freedman, and D.L. Braff

### A Randomized Trial Examining the Effectiveness of Switching From Olanzapine, Quetiapine, or Risperidone to Aripiprazole to Reduce Metabolic Risk: Comparison of Antipsychotics for Metabolic Problems (CAMP)

T.S. Stroup, J.P. McEvoy, K.D. Ring, R.H. Hamer, L.M. LaVange, M.S. Swartz, R.A. Rosenheck, D.O. Perkins, A.M. Nussbaum, and J.A. Lieberman, for the Schizophrenia Trials Network

\*Can't wait? Visit [ajp.psychiatryonline.org](http://ajp.psychiatryonline.org) and click the “AJP in Advance” logo to see all articles uploaded in advance of print!



# get CME from AJP

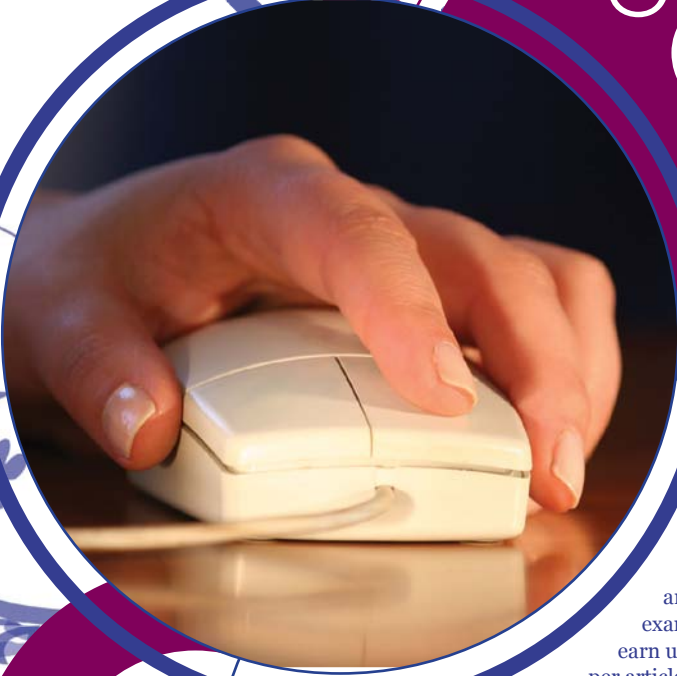

Brief companion exams are created for three of the most influential articles from each issue. By reading the articles and completing the online exams, you can test your knowledge and earn up to 1 *AMA PRA Category 1 Credit*<sup>™</sup> per article. Correct answers are highlighted for your reference upon completion of the course. A link from the question to the correct answer in context will also be highlighted in the associated article, thus extending the learning experience.

CME credit is only provided online, and a subscription to the AJP CME program is required. From the moment you subscribe to the AJP CME program, you will be able to select from 72 courses from among 40 possible subject areas. You'll also be able to access the next 33 courses as they become available. For more information and pricing, please go to <http://cme.psychiatryonline.org/misc/aboutajpcme.shtml>

This activity is sponsored by the American Psychiatric Association. The American Psychiatric Association is accredited by the Accreditation Council for Continuing Medical Education to provide continuing medical education for physicians. The American Psychiatric Association designates each educational activity for a maximum of 1 *AMA PRA Category 1 Credit*<sup>™</sup>. Physicians should only claim credit commensurate with the extent of their participation in the activity.

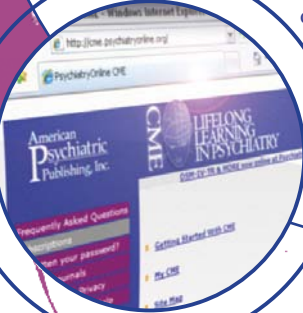

Fulfill your CME requirement while staying current on the latest advances in psychiatry.  
Subscribe to AJP CME!

## Contents

- A5 Editorial Board  
A7 Highlights of this issue

## Editorials

- 85 **When does depression become a mental disorder?**  
M. Maj
- 87 **Pathological gambling: a neurobiological and clinical update**  
H. Bowden-Jones and L. Clark

- 89 **Reading for well-being – 100 words**  
David Fearnley

- 90 **Pressures to adhere to treatment: observations on 'leverage' in English mental healthcare**  
T. Zigmond

- 92 **Music therapy for depression: it seems to work, but how?**  
A. Maratos, M. J. Crawford and S. Procter

## In debate

- 94 **Praying with a patient constitutes a breach of professional boundaries in psychiatric practice**  
R. Poole/C. C. H. Cook

## Review article

- 99 **Guidelines for screening and monitoring of cardiometabolic risk in schizophrenia: systematic evaluation**  
M. De Hert, D. Vancampfort, C. U. Correll, V. Mercken, J. Peuskens, K. Sweers, R. van Winkel and A. J. Mitchell

## Papers

- 106 **Antenatal depression and offspring psychopathology: the influence of childhood maltreatment**  
S. Pawby, D. Hay, D. Sharp, C. S. Waters and C. M. Pariante

- 113 **Psychopathology of perpetrators of fabricated or induced illness in children: case series**  
C. Bass and D. Jones

- 118 **4:48 Psychosis (excerpt) – extra**  
Sarah Kane

- 119 **Prevalence of dementia in African-Caribbean compared with UK-born White older people: two-stage cross-sectional study**  
S. Adelman, M. Blanchard, G. Rait, G. Leavey and G. Livingston

- 125 **Exposure to chemical warfare during the First World War: shell shock poetry of Wilfred Owen – extra**  
Menachem Ben-Ezra

- 126 **Oestrogen receptor polymorphisms and late-life depression**  
J. Ryan, J. Scali, I. Carrière, K. Peres, O. Rouaud, P.-Y. Scarabin, K. Ritchie and M.-L. Ancelin

- 132 **Individual music therapy for depression: randomised controlled trial**  
J. Erkkilä, M. Punkanen, J. Fachner, E. Ala-Ruona, I. Pönttiö, M. Tervaniemi, M. Vanhala and C. Gold

- 139 **Out of me – extra**  
Fiona Shaw

- 140 **Nocturnal enuresis in patients taking clozapine, risperidone, olanzapine and quetiapine: comparative cohort study**  
M. Harrison-Woolrych, K. Skegg, J. Ashton, P. Herbison and D. C. G. Skegg

- 145 **Pressures to adhere to treatment ('leverage') in English mental healthcare**  
T. Burns, K. Yeeles, A. Molodynski, H. Nightingale, M. Vazquez-Montes, K. Sheehan and L. Linsell

- 151 **OPCRIT+: an electronic system for psychiatric diagnosis and data collection in clinical and research settings**  
J. Rucker, S. Newman, J. Gray, C. Gunasinghe, M. Broadbent, P. Brittain, M. Baggaley, M. Denis, J. Turp, R. Stewart, S. Lovestone, G. Schumann, A. Farmer and P. McGuffin

## Short reports

- 156 **Psychiatric morbidity in prisoners with intellectual disabilities: analysis of prison survey data for England and Wales**  
A. Hassiotis, D. Gazizova, L. Akinlonu, P. Bebbington, H. Meltzer and A. Strydom

- 158 **Pathological gambling and the treatment of psychosis with aripiprazole: case reports**  
N. Smith, N. Kitchenham and H. Bowden-Jones

## Columns

- 160 **Ten books**  
164 **Correspondence**  
168 **Book reviews**  
170 **Contents of *Advances in Psychiatric Treatment***  
171 **Contents of the *American Journal of Psychiatry***  
172 **From the Editor's desk**

## Cover picture

*Desperately Depressed* (2010).  
Ravinder Kaur (b. 1985)

'I just don't want to wake up every morning. You can't possibly know how I feel!' These words resonated against every surface in my small, stuffy and somewhat dated consultation room. What could I say to this woman sitting with her head buried in her hands in front of me? She was right after all: I couldn't possibly know how she felt. As a foundation year doctor with only a morsel of undergraduate psychiatry training behind me, here I was in my general practice rotation, faced with a patient with depression and the responsibility to treat them.

Later that evening my thoughts lingered on my encounter with this patient. I started doodling how she appeared to me, engulfed in her feelings of loneliness, worthlessness and guilt and unable to see a way out. This is my depiction of her as an outsider looking in, trying desperately to help.

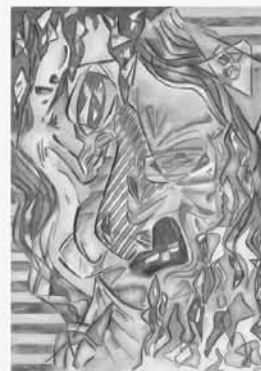

We are always looking for interesting and visually appealing images for the cover of the *Journal* and would welcome suggestions or pictures, which should be sent to Dr Allan Beveridge, British Journal of Psychiatry, 17 Belgrave Square, London SW1X 8PG, UK or [bjp@rcpsych.ac.uk](mailto:bjp@rcpsych.ac.uk).
