# THE AMERICAN JOURNAL OF PSYCHIATRY

---

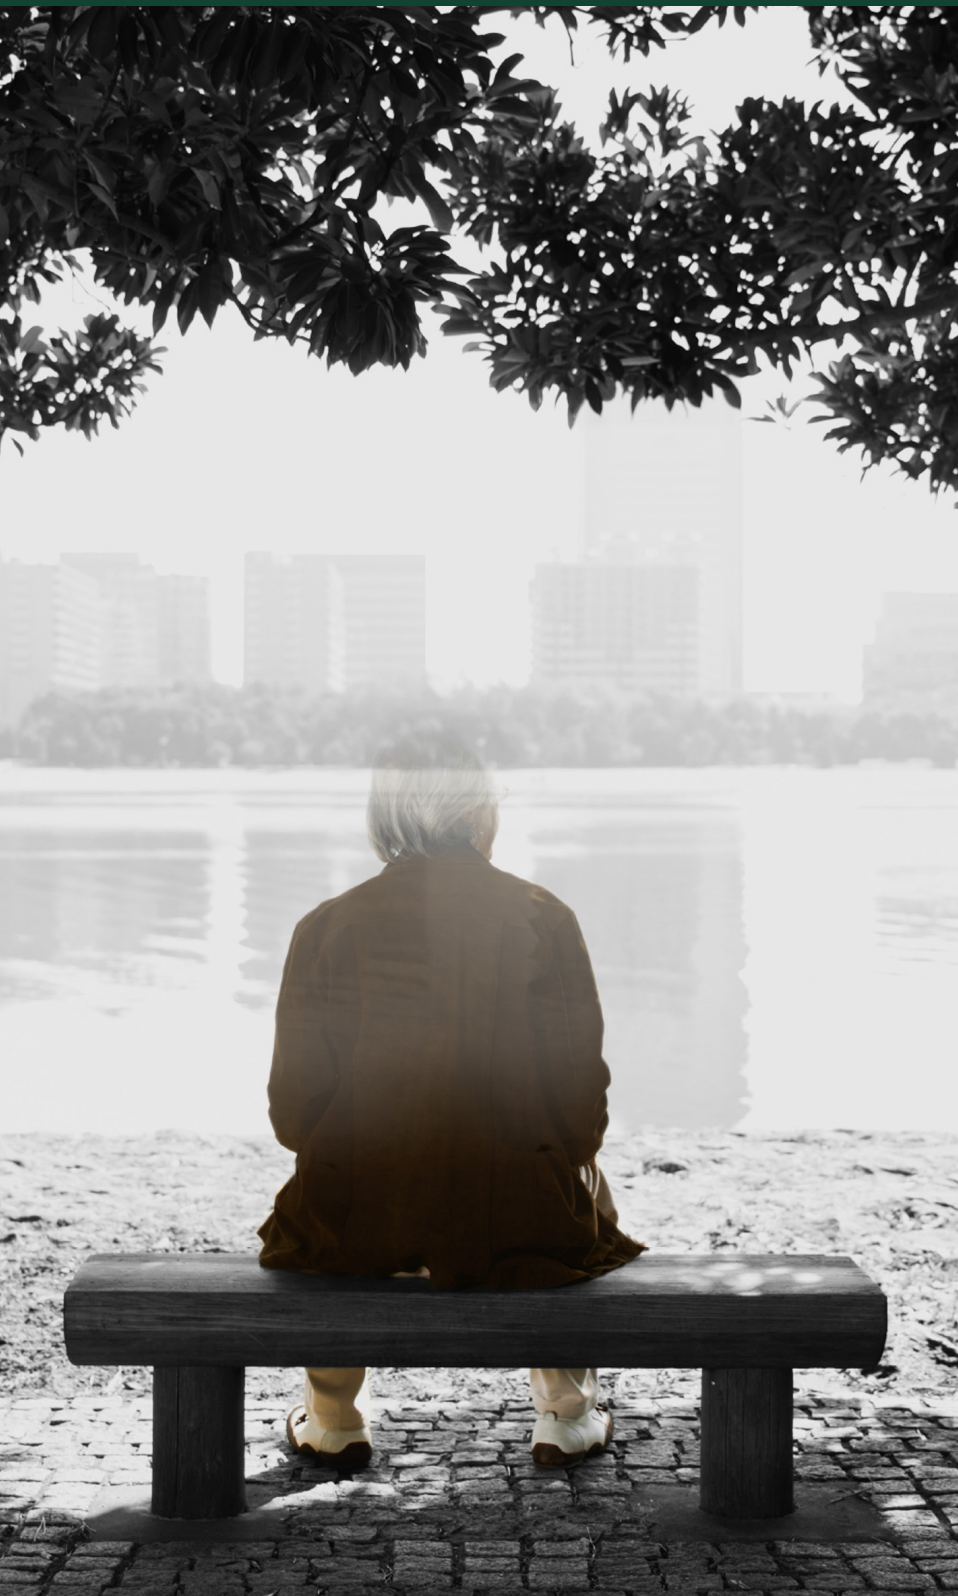

**The NIMH-CATIE Schizophrenia Study: What Did We Learn?**

Jeffrey A. Lieberman, M.D., and T. Scott Stroup, M.D., M.P.H. 770

**A New Lead From Genetic Studies in Depressed Siblings: Assessing Studies of Chromosome 3**

Steven P. Hamilton, M.D., Ph.D. 783

**At Clinical High Risk for Psychosis: Outcome for Nonconverters**

Jean Addington, Ph.D., et al. 800

◀ **Cognitive Effects of Atypical Antipsychotic Medications in Patients With Alzheimer's Disease: Outcomes From CATIE-AD**

Cheryl L.P. Vigen, Ph.D., et al. 831

**Continuing Medical Education 869**

**August 2011**

**Volume 168 • Number 8**

---

Official Journal of the  
AMERICAN PSYCHIATRIC ASSOCIATION

---

[ajp.psychiatryonline.org](http://ajp.psychiatryonline.org)
